# Supplementary material for: First-principles study of the formation and migration of native defects in LiNH2BH3
Source: Royal Society of Chemistry journal article supplement (doi:10.1039/c2cp43016a), 2012-11-20
Supplement: c2cp43016a.pdf [file c2cp43016a.pdf]

## Supporting material (ESI) for PCCP

### First-Principles Study of the Formation and Migration of Native Defects in $\text{LiNH}_2\text{BH}_3$

Xiaowei Chen,<sup>a</sup> Yu-Jun Zhao,<sup>b</sup> Xuebin Yu<sup>\*a</sup>

<sup>a</sup>*Department of Materials Science, Fudan University, Shanghai, China, 200433*

<sup>b</sup>*Department of Physics, South China University of Technology, Guangzhou, China,  
510640*

\* To whom correspondence should be addressed. Phone and Fax: +86-21-5566 4581.

E-mail: [yuxuebin@fudan.edu.cn](mailto:yuxuebin@fudan.edu.cn) (X Yu)

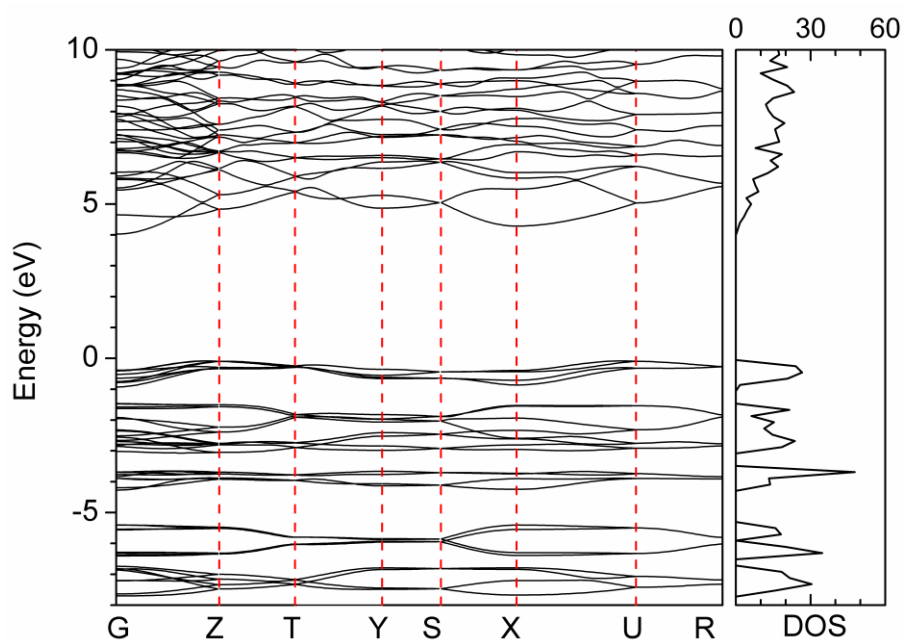

Figure S1. The left panel contains the calculated band structure of the ground state of  $\text{LiNH}_2\text{BH}_3$ . The right panel is the complete electron density of states, in arbitrary units.

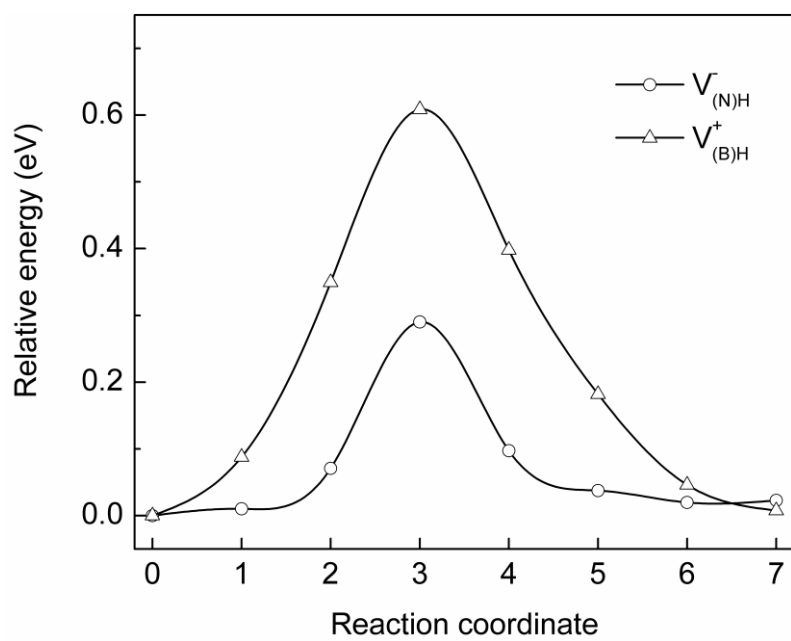

Figure S2. The energy profiles for the migration of  $V_{(B)H}^+$  and  $V_{(N)H}^-$ .

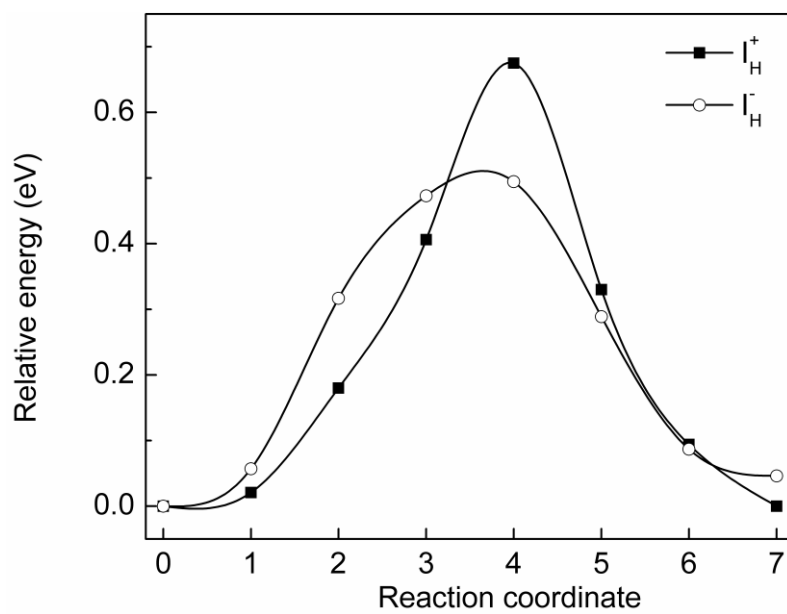

Figure S3. The energy profiles for the migration of  $I_H^+$  and  $I_H^-$ .

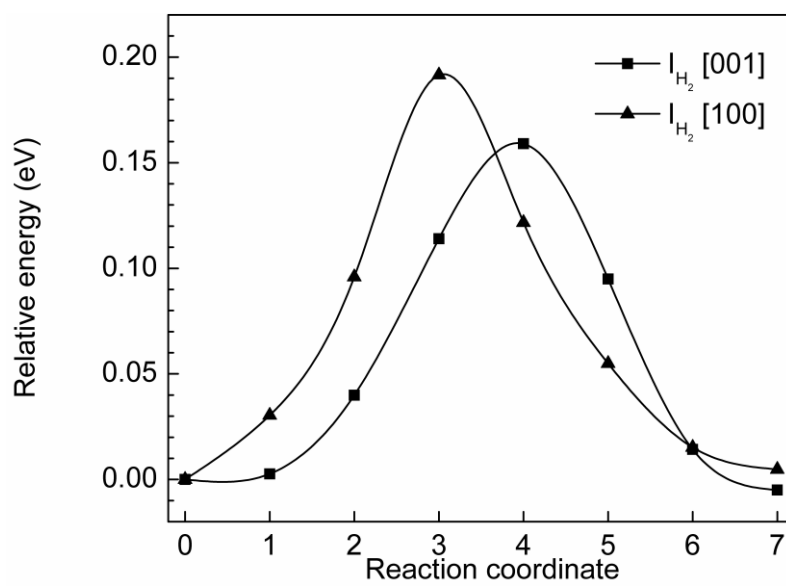

Figure S4. The energy profiles for the migration of neutral H<sub>2</sub> interstitial along [100] and [001] direction.

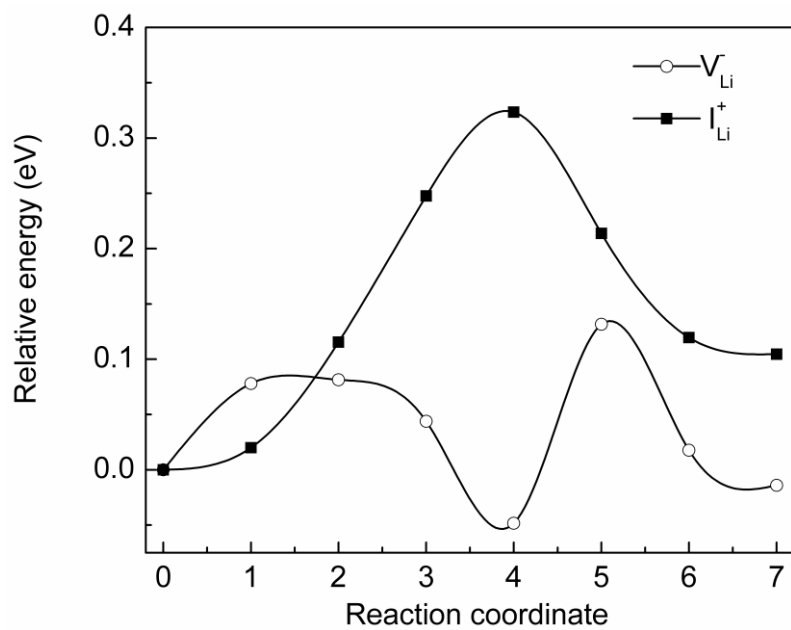

Figure S5. The energy profiles for the migration of  $I_{Li}^+$  and  $V_{Li}^-$ .
